# Supplementary material for: Elevated KIR expression and diminished intensity of CD7 on NK cell subsets among treatment naïve HIV infected Ethiopians
Source: PubMed Central journal article supplement (PMC9427747; doi:10.1038/s41598-022-18413-3), 2022-08-30
Supplement: 41598_2022_18413_MOESM1_ESM.pdf [file 41598_2022_18413_MOESM1_ESM.pdf]

**Elevated KIR expression and diminished intensity of CD7 on NK cell subsets among  
treatment naïve HIV infected Ethiopians**

Henok Andualem<sup>1\*</sup>, Mulualem Lemma<sup>2</sup>, Amare Keflie<sup>2</sup>, Meseret Workeneh (MW)<sup>2</sup>, Birhanu Ayelign<sup>2</sup>, Yayehyirad Tassachew<sup>3</sup>, Lidya Hailu<sup>1</sup>, Alene Geteneh<sup>4</sup>, Adane Mihret<sup>5</sup>, Martha Zewdie<sup>5</sup>, Rawleigh Howe<sup>5</sup>

<sup>1</sup> Department of medical laboratory science, college of medicine and health science, Debre Tabor University, Debre Tabor, Ethiopia. <sup>2</sup> Department of Immunology and molecular biology, school of medical laboratory science, college of medicine and health science, University of Gondar, Gondar, Ethiopia; <sup>3</sup> School of Medical Laboratory Sciences, College of Medicine and Health Sciences, Hawassa University, Hawassa, Ethiopia. <sup>4</sup> College of health science, Woldia University, Wondia, Ethiopia. <sup>5</sup> Armauer Hansen Research Institute (AHRI), Addis Ababa, Ethiopia.

**Supplementary Table S1:** The viral load on HAART naïve HIV patients

| <b>Patient ID</b> | <b>Viral Load<br/>Copies/ml</b> |
|-------------------|---------------------------------|
| AL-002            | 100122                          |
| KOL-001           | 275615                          |
| PA-001            | 41074                           |
| AL-004            | 209435                          |
| AD-001            | 166090                          |
| AK-001            | 35000                           |
| AK-002            | 5153                            |
| KOL_002           | 36775                           |
| KOL-003           | 173853                          |
| AB-001            | 105011                          |
| AL-005            | 98076                           |
| KOL-004           | 144895                          |
| KOL-005           | 4039                            |
| AL-004            | 209435                          |
| KOL_002           | 36775                           |
